# Supplementary material for: Role of Muscle Mass and Muscle Quality in the Association Between Diabetes and Gait Speed
Source: PubMed Central journal article supplement — Diabetes Care. 2012 Jul 14;35(8):1672–9. doi: 10.2337/dc11-2202 (PMC3402248; doi:10.2337/dc11-2202), 2012-07-14

SUPPLEMENTARY DATA

**Supplementary Figure 1.** Examples of two pQCT transverse scans obtained at 66% of the tibial length starting from the tibiotarsal joint. Scans are from two subjects with different level of muscle fat infiltration (light gray)

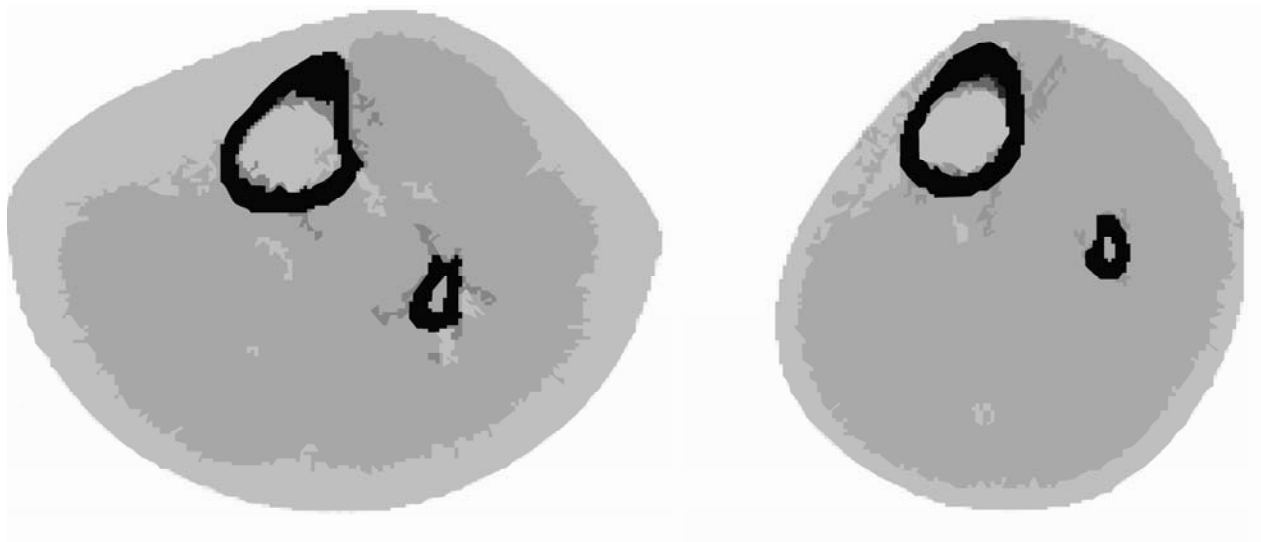

Supplement: supp_dc11-2202v112202_DC112202SupplementaryData.pdf [file supp_dc11-2202v112202_DC112202SupplementaryData.pdf]
